# Supplementary material
Source: HighWire-hosted journal article supplement (https://bmjopen.bmj.com/content/10/1/e034666)

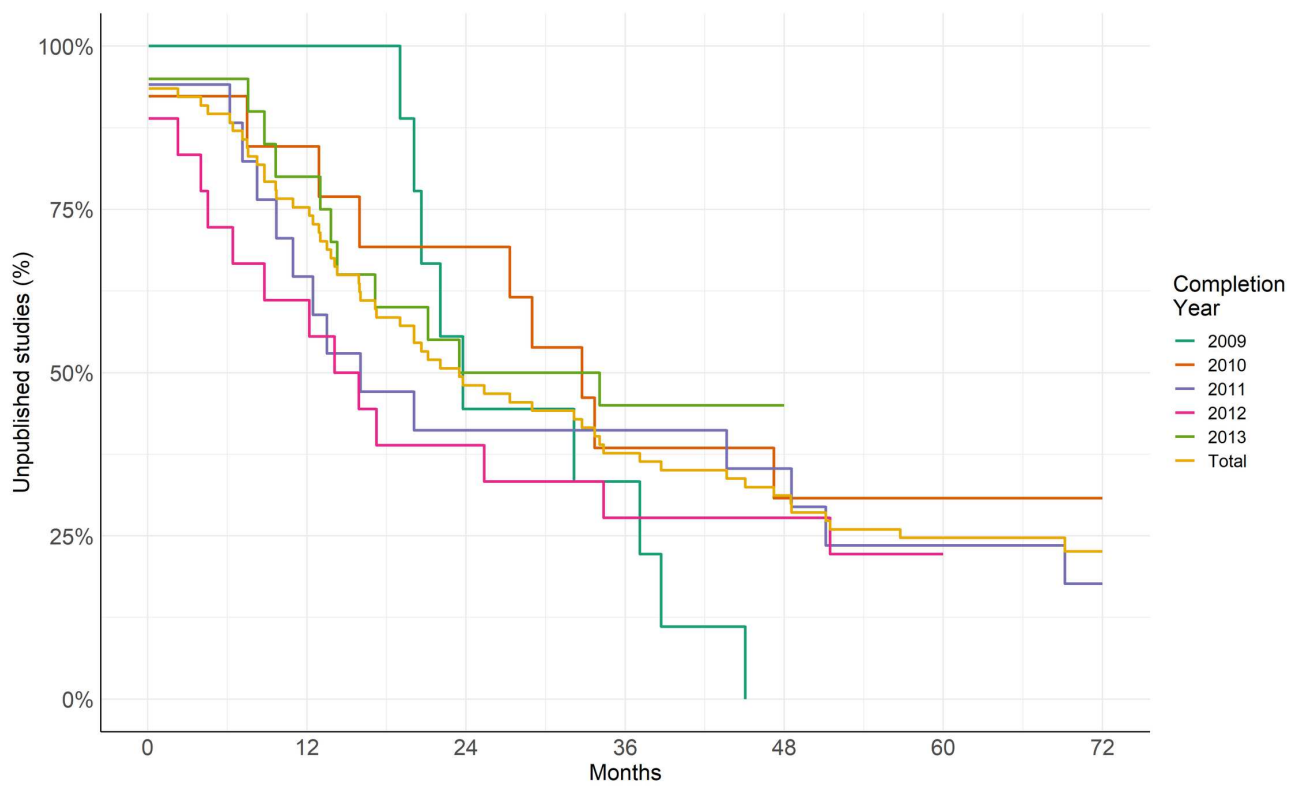

Supplement: inline-supplementary-material-4 [file inline-supplementary-material-4.pdf]
